# Supplementary material for: Genetic predisposition to ductal carcinoma in situ of the breast
Source: Breast Cancer Res. 2016 Feb 17;18:22. doi: 10.1186/s13058-016-0675-7 (PMC4756509; doi:10.1186/s13058-016-0675-7)
Supplement: Additional file 8: — Age-specific case-only analysis of patients with ductal carcinoma in situ (DCIS) diagnosed at age <50 vs ≥50 years. P-Het P value for heterogeneity, SNP single nucleotide polymorphism, OR odds ratio. (XLSX 17 kb) [file 13058_2016_675_MOESM8_ESM.xlsx]

## Sheet: Additional file 8
Additional File 8. Association of DCIS with known breast cancer predisposition loci. Age specific case only analysis of age of diagnosis (AoD)<50 vs AoD≥50
					5,720 cases and 39,349 controls				983 cases <50 AoD and 3,651 cases ≥ 50 AoD
Chromosome	Position	SNP	Locus	Controls	DCIS vs Controls				Age specific DCIS case only
				RAF	OR	95% CI	P		P-Het
18	24337424	rs527616	18q11.2	0.63	1.05263	(1.01, 1.11)	0.0198		0.0003017
16	52586341	rs3803662	TOX3	0.26	1.15	(1.10, 1.21)	1.7x10-08		0.004085
2	217905832	rs13387042	2q35	0.51	1.0989	(1.05, 1.15)	1.1x10-05		0.01487
14	37132769	rs2236007	PAX9	0.79	1.06383	(1.01, 1.12)	0.0268		0.0162
7	139942304	rs11977670	7q34	0.43	1.02	(0.97, 1.06)	0.4422		0.0297
3	4742276	rs6762644	3p26.2	0.4	1.08	(1.03, 1.13)	0.0009031		0.03913
8	29509616	rs9693444	8p21.1	0.32	1.08	(1.03, 1.13)	0.001716		0.05444
4	175846426	rs6828523	ADAM29	0.88	1.11111	(1.04, 1.19)	0.002572		0.06077
22	40876234	rs6001930	MKL1	0.11	1.09	(1.01, 1.16)	0.01982		0.09029
9	22062134	rs1011970	CDKN2A/B	0.17	1.08	(1.02, 1.14)	0.01054		0.09319
14	91841069	rs941764	CCDC88C	0.34	1.07	(1.02, 1.12)	0.003208		0.1056
2	19320803	rs12710696	2p24.1	0.36	1.06	(1.01, 1.11)	0.0195		0.1244
3	27416013	rs4973768	SLC4A7	0.47	1.13	(1.08, 1.18)	9.1x10-08		0.1315
2	202149589	rs1045485	CASP8	0.87	1.0101	(0.94, 1.08)	0.8212		0.1571
11	129461171	rs11820646	11q24.3	0.59	1.04167	(1.00, 1.10)	0.05033		0.1576
5	1297488	rs2736108	TERT	0.71	1.04167	(1.00, 1.10)	0.07433		0.1689
6	151914113	rs3757318	ESR1	0.07	1.2	(1.10, 1.30)	1.4x10-05		0.1759
1	121280613	rs11249433	1p11.2	0.41	0.98	(0.94, 1.02)	0.3661		0.1856
12	14413931	rs12422552	12p13.1	0.26	1.08	(1.03, 1.13)	0.002425		0.2095
10	123093901	rs11199914	10q26.12	0.68	1.04167	(0.99, 1.09)	0.09546		0.2206
8	128355618	rs13281615	8q24	0.41	1.06	(1.01, 1.11)	0.01448		0.2531
3	30682939	rs12493607	TGFBR2	0.34	0.99	(0.95, 1.04)	0.8042		0.2595
12	115836522	rs1292011	12q24	0.58	1.08696	(1.03, 1.14)	0.0007137		0.2618
12	28155080	rs10771399	PTHLH	0.88	1.14943	(1.06, 1.23)	0.0002099		0.2667
19	18571141	rs4808801	SSBP4	0.65	1.1236	(1.06, 1.18)	3.1x10-06		0.2855
1	204518842	rs4245739	MDM4	0.26	1.09	(1.04, 1.14)	0.0007336		0.3067
5	58337481	rs1353747	PDE4D	0.9	1.11111	(1.03, 1.20)	0.005646		0.3717
6	13722523	rs204247	RANBP1	0.44	1.03	(0.99, 1.08)	0.1434		0.3838
4	106084778	rs9790517	TET2	0.21	1.02	(0.97, 1.08)	0.3886		0.4141
19	17389704	rs8170	MERIT40	0.19	1.02	(0.97, 1.08)	0.4394		0.4548
10	22315843	rs11814448	DNAJC1	0.02	1.21	(1.04, 1.41)	0.0121		0.4688
21	16520832	rs2823093	NRIP1	0.73	1.06383	(1.01, 1.12)	0.01404		0.471
19	17394124	rs2363956	MERIT40	0.49	1.03	(0.99, 1.08)	0.145		0.4747
6	82128386	rs17529111	6q14.1	0.21	1.03	(0.98, 1.09)	0.2581		0.5143
12	96027759	rs17356907	NTN4	0.7	1.07527	(1.03, 1.14)	0.002276		0.523
1	10566215	rs616488	PEX14	0.66	1.07527	(1.02, 1.12)	0.004318		0.533
10	123337335	rs2981579	FGFR2	0.4	1.29	(1.24, 1.35)	9.0x10-30		0.5333
14	68660428	rs2588809	RAD51L1	0.16	1.1	(1.04, 1.17)	0.001493		0.5696
19	44286513	rs3760982	19q13.31	0.47	1.02	(0.98, 1.07)	0.3183		0.5743
1	114448389	rs12022378	1p13.2	0.17	1.03	(0.97, 1.10)	0.2856		0.5852
11	1909006	rs3817198	LSP1	0.31	1.03	(0.98, 1.08)	0.2523		0.6026
5	56031884	rs889312	MAP3K1	0.28	1.14	(1.09, 1.20)	6.9x10-08		0.6034
2	218296508	rs16857609	2q35	0.26	1.08	(1.03, 1.13)	0.002891		0.6208
11	65583066	rs3903072	11q13.1	0.53	1.02041	(0.98, 1.06)	0.3196		0.6535
5	1279790	rs10069690	TERT	0.26	1.08	(1.03, 1.14)	0.001338		0.6661
10	123352317	rs2981582	FGFR2	0.38	1.28	(1.23, 1.34)	1.8x10-27		0.6701
1	202187176	rs6678914	LGR6	0.59	1.04167	(0.99, 1.09)	0.1134		0.6707
18	24570667	rs1436904	CHST9	0.6	1.03093	(0.98, 1.08)	0.2287		0.6808
2	174212894	rs1550623	CDCA7	0.84	1.03093	(0.97, 1.09)	0.3946		0.6945
22	29621477	rs132390	22q12.2	0.04	0.99	(0.88, 1.12)	0.8906		0.698
5	44706498	rs10941679	5p12	0.25	1.14	(1.09, 1.20)	1.3x10-07		0.7066
16	53813367	rs17817449	FTO	0.6	1.08696	(1.03, 1.14)	0.0005286		0.7279
16	53855291	rs11075995	FTO	0.24	1.03	(0.98, 1.09)	0.1945		0.7468
5	158244083	rs1432679	EBF1	0.44	1.05	(1.00, 1.10)	0.03414		0.7547
11	69379161	rs75915166	CCND1	0.06	1.12	(1.02, 1.23)	0.0127		0.7587
10	80841148	rs704010	ZMIZ1	0.39	1.06	(1.01, 1.11)	0.009153		0.7657
7	144074929	rs720475	7q35	0.74	1.07527	(1.03, 1.14)	0.003091		0.7708
2	121245122	rs4849887	2q14.2	0.9	1.13636	(1.05, 1.23)	0.000883		0.7811
14	69034682	rs999737	RAD51L1	0.77	1.06383	(1.01, 1.12)	0.01703		0.7901
8	129194641	rs11780156	8q24.21	0.16	1.11	(1.05, 1.18)	0.0002748		0.801
8	76417937	rs2943559	HNF4G	0.07	1.15	(1.06, 1.25)	0.0007359		0.8121
10	5886734	rs2380205	ANKRD16	0.56	1	(0.95, 1.04)	0.8755		0.8183
16	80650805	rs13329835	CDYL2	0.22	1.07	(1.02, 1.13)	0.01117		0.8265
5	58184061	rs10472076	RAB3C	0.37	1.08	(1.03, 1.12)	0.001671		0.8318
10	114773927	rs7904519	TCF7L2	0.46	1.05	(1.00, 1.09)	0.04212		0.8328
2	172972971	rs2016394	2q31.1	0.52	1.04167	(1.00, 1.10)	0.04219		0.8347
10	22032942	rs7072776	DNAJC1	0.28	1	(0.95, 1.05)	0.9626		0.8403
8	76230301	rs6472903	8q21.11	0.82	1.0989	(1.03, 1.16)	0.00266		0.8464
6	151948366	rs2046210	ESR1	0.34	1.1	(1.05, 1.15)	8.6x10-05		0.8473
6	1318878	rs11242675	FOXQ1	0.61	1.05263	(1.01, 1.10)	0.02664		0.8564
11	69331642	rs554219	CCND1	0.12	1.15	(1.08, 1.22)	2.8x10-05		0.8615
9	110888478	rs865686	9q31.2	0.62	1.07527	(1.02, 1.12)	0.002522		0.8821
3	63941697	rs3821902	ATXN7	0.13	1.16	(1.09, 1.23)	3.0x10-06		0.8933
17	53056471	rs6504950	COX11	0.72	1.04167	(0.99, 1.09)	0.1478		0.8996
10	64278682	rs10995190	ZNF365	0.85	1.16279	(1.09, 1.23)	4.1x10-06		0.9057
9	110306115	rs10759243	9q31.2	0.28	1.03	(0.98, 1.08)	0.2308		0.9791
