# Supplementary material for: Genetic predisposition to ductal carcinoma in situ of the breast
Source: Breast Cancer Res. 2016 Feb 17;18:22. doi: 10.1186/s13058-016-0675-7 (PMC4756509; doi:10.1186/s13058-016-0675-7)
Supplement: Additional file 12: — Association of rs75915166 and rs554219 with grade in invasive ductal carcinoma ( IDC ). P-Het P value for heterogeneity, OR odds ratio. (XLSX 9 kb) [file 13058_2016_675_MOESM12_ESM.xlsx]

## Sheet: Additional file 12
Additional File 12. Association of rs75915166 and rs554219 with grade in IDC
rs75915166
Grade specific case control	N	OR	(95% CI)	P-value
Grade I/II vs controls	(12,582 cases 29,464 controls)	1.42	(1.33, 1.50)	1.7x10-30
Grade III vs controls	(6,991 cases, 29,464 controls)	1.07	(0.99, 1.16)	0.09
Case only III vs I/II	N	OR	(95% CI)	P-Het
unadjusted	(12,582 grade I/II 6,991 grade III)	0.76	(0.70, 0.83)	2.8x10-10
unadjusted (only cases with ER status)	(10,998 grade I/II 6,148 grade III)	0.76	(0.70, 0.84)	4.5x10-09
adjusted for ER status	(10,998 grade I/II 6,148 grade III)	0.79	(0.72, 0.87)	1.6x10-06
ER+ only	(9,947 grade I/II, 3,458 grade III)	0.8	(0.71, 0.89)	4.4x10-05
rs554219
Grade specific case control	N	OR	(95% CI)	P-value
Grade I/II vs controls	(12,582 cases 29,464 controls)	1.39	(1.33, 1.45)	4.7x10-49
Grade III vs controls	(6,991 cases, 29,464 controls)	1.06	(1.00, 1.13)	0.039
Case only III vs I/II	N	OR	(95% CI)	P-Het
unadjusted	(12,582 grade I/II 6,991 grade III)	0.77	(0.72, 0.81)	1.3x10-17
unadjusted (only cases with ER status)	(10,998 grade I/II 6,148 grade III)	0.77	(0.72, 0.82)	2.4x10-15
adjusted for ER status	(10,998 grade I/II 6,148 grade III)	0.81	(0.76, 0.87)	1.3x10-08
ER+ only	(9,947 grade I/II, 3,458 grade III)	0.8	(0.74, 0.87)	4.5x10-08
