# Supplementary figures and images for: Genetic predisposition to ductal carcinoma in situ of the breast
Source: Springer Nature journal article supplement (doi:10.1186/s13058-016-0675-7), 2016-02-16

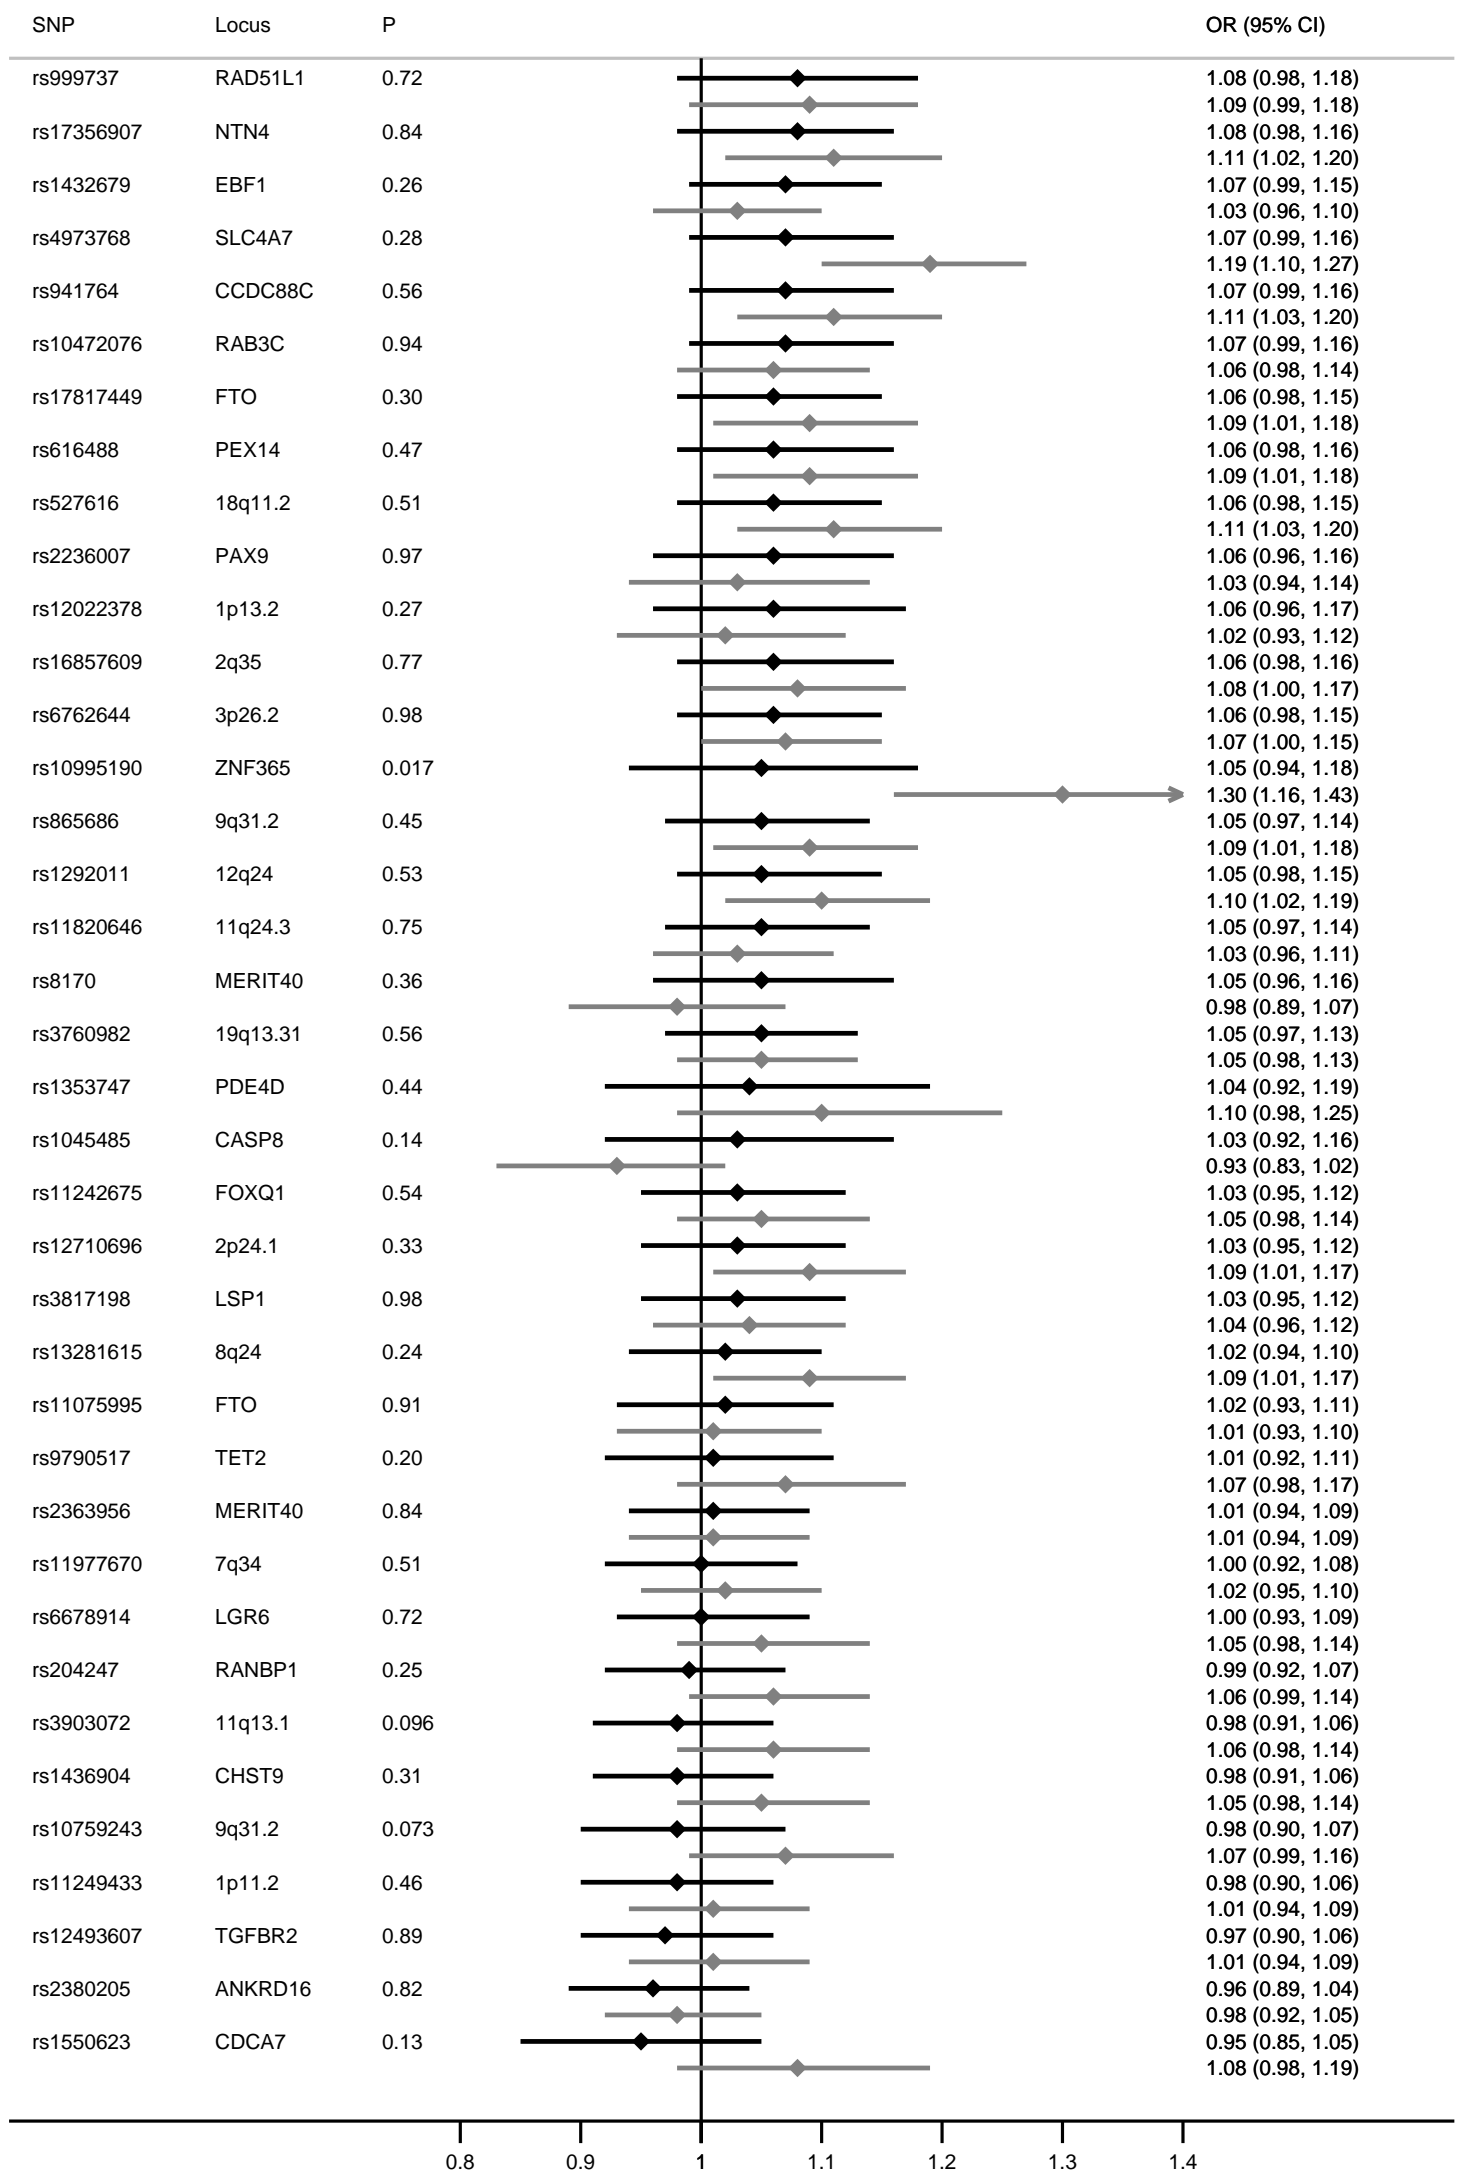

Supplement: MOESM10 [file 9781642]

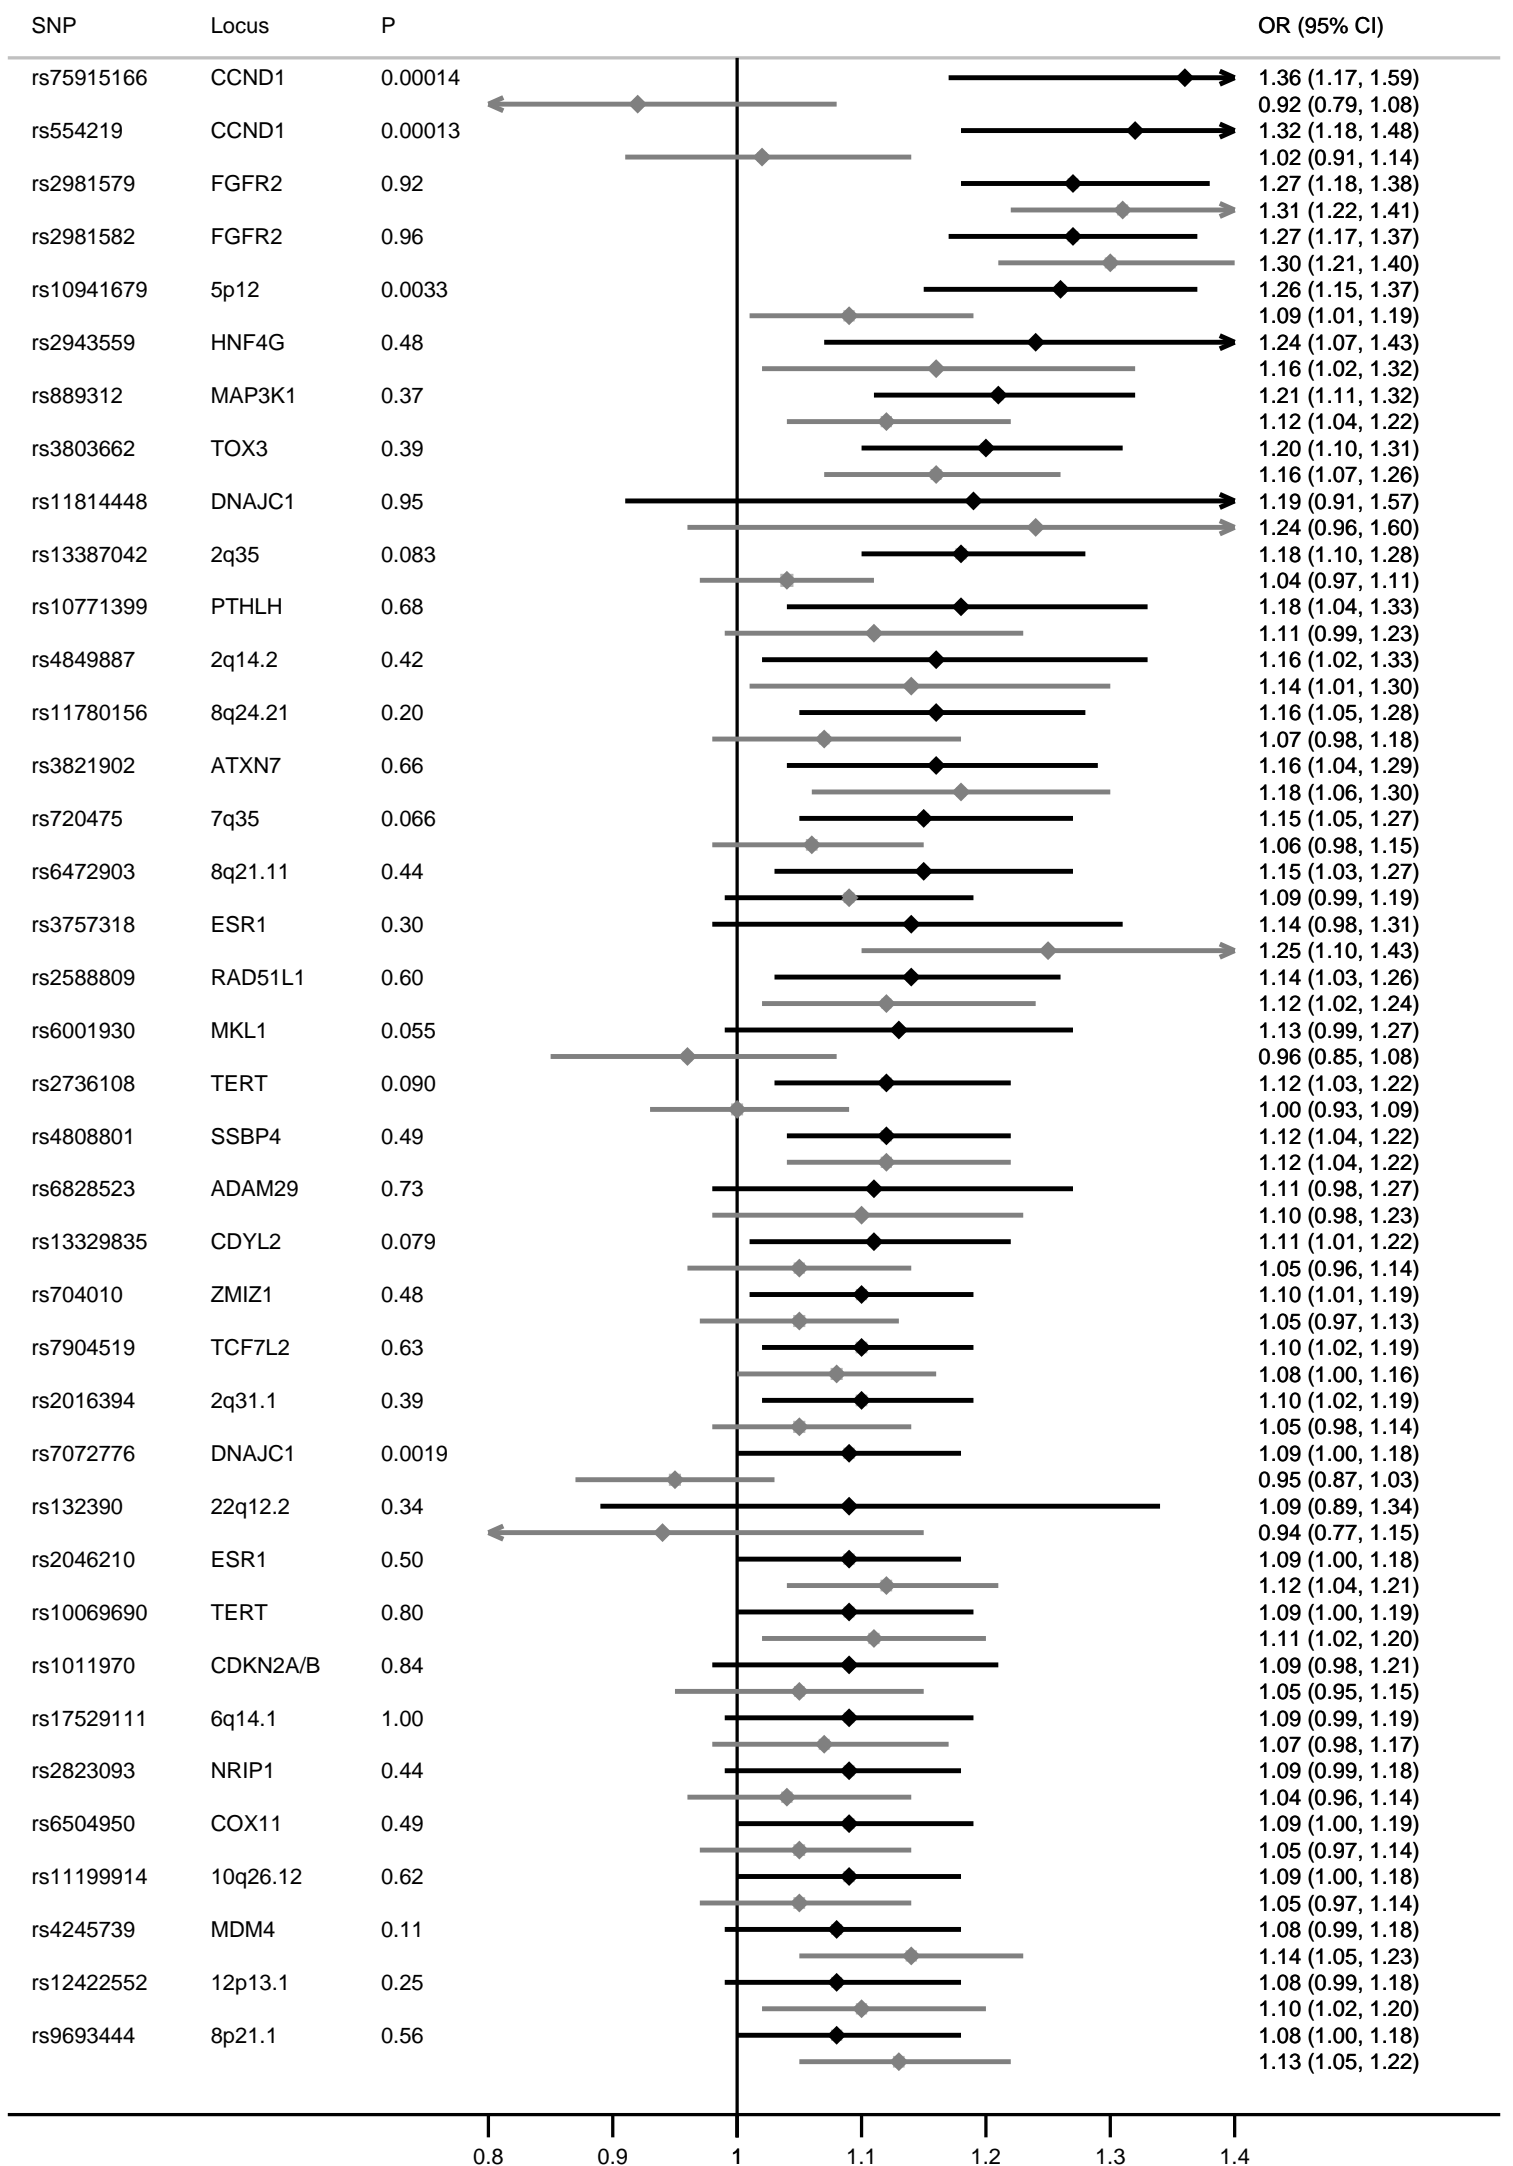

Supplement: MOESM10 [file 9781642]
